# Supplementary material for: Lymphatic disorders caused by mosaic, activating KRAS variants respond to MEK inhibition
Source: JCI Insight. 2023 May 8;8(9):e155888. doi: 10.1172/jci.insight.155888 (PMC10243805; doi:10.1172/jci.insight.155888)
Supplement: Supplemental data [file jciinsight-8-155888-s241.pdf]

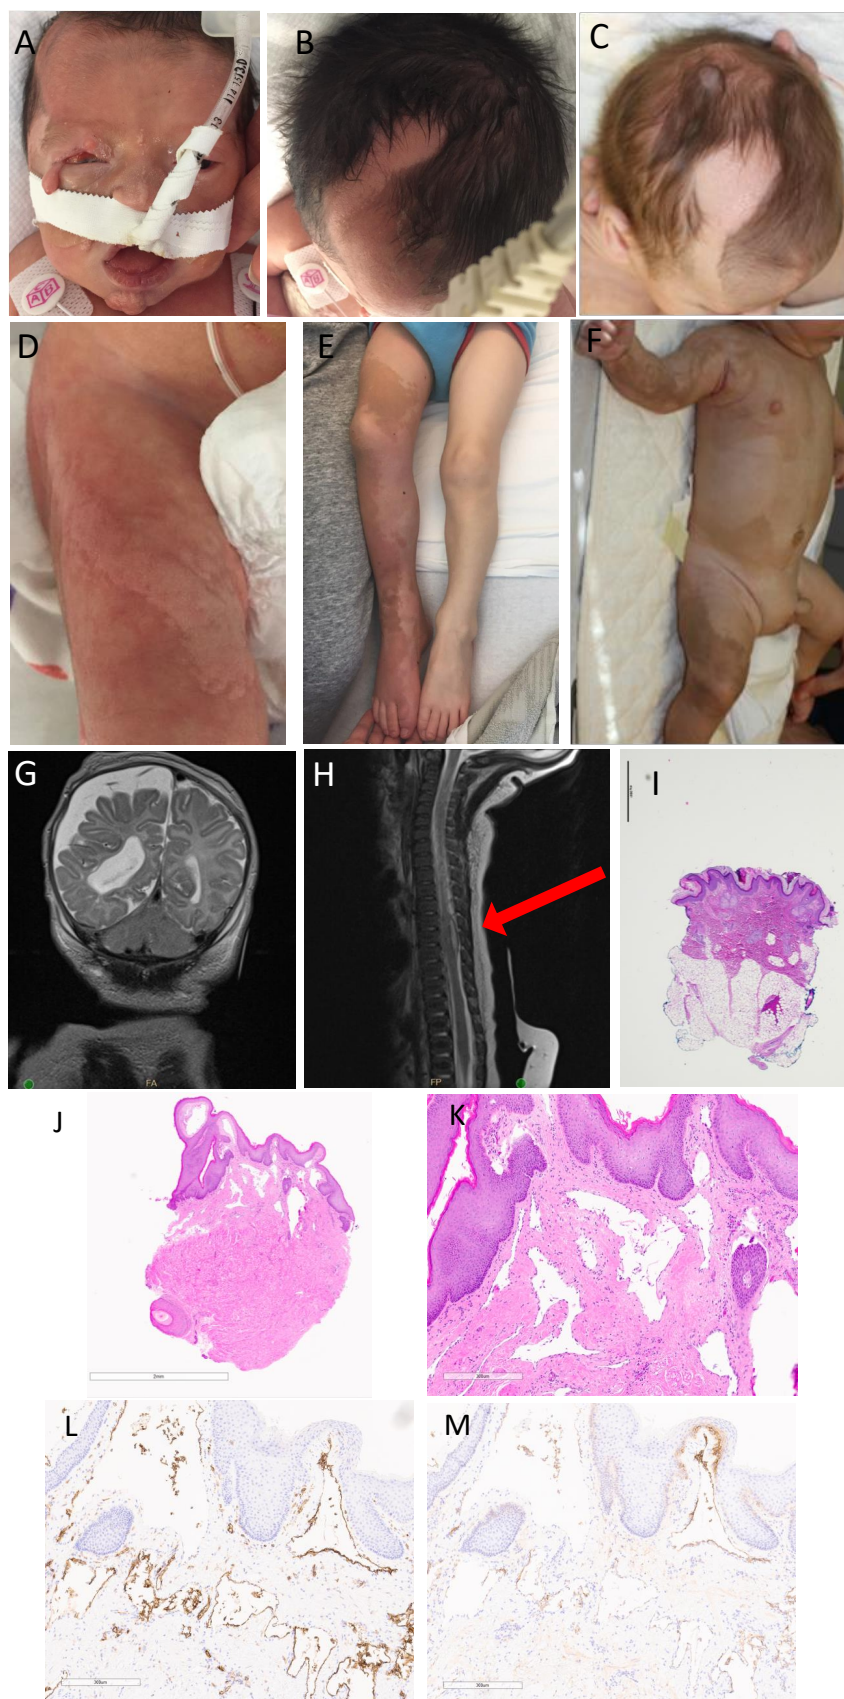

Supplemental Figure 1: Participant photographs, imaging, and pathology. A. Eyelid coloboma, a lateral epibulbar choristoma, a pedunculated papule on the eyelid, nevus sebaceous on midline face (Individual 1 at 1 day old). B. Nevus psiloparus on scalp (Individual 1 at 1 day old). C. Nevus sebaceous and cutis aplasia (Individual 3 at 4 months old). D. Nevus sebaceous on leg (Individual 1). E. Hemihypertrophy and edema of right leg (Individual 3 at 4 years old). F. Extensive nevus sebaceous following blaschkoid lines (Individual 3 at 4 months old). G. Brain MRI demonstrates enlargement of the extra-axial spaces overlying the right frontal, parietal and temporal lobes and asymmetric volume loss in the right cerebral hemisphere, including the frontal lobe, parietal lobe, temporal lobe and occipital lobe, with associated ventriculomegaly & deep sulci (Individual 1). H. Spine MRI demonstrates extramedullary, intraspinal lipoma measuring approximately 6 mm AP x 6 mm transverse x 2.5 cm craniocaudal along the dorsal surface of the thoracic spinal cord from approximately T5-6 down to T9 (Individual 1). I. Histology of nevus sebaceous at 10x magnification. The epidermis shows papillomatosis and hyperkeratosis. The dermis shows a few sebaceous lobules. The specimen contains a sparse inflammatory infiltrate (Individual 1). J. Low power view of lymphatic malformation with subepithelial microcystic channels (Individual 4, H&E, 20x). K. Higher power of microcystic lymphatic changes with flattened endothelial cells (Individual 4, H&E, 65x). L. CD31 staining of lymphatic endothelial cells (Individual 4, 65x). M. D2-40 staining of lymphatic endothelial cells (Individual 4, 65x).

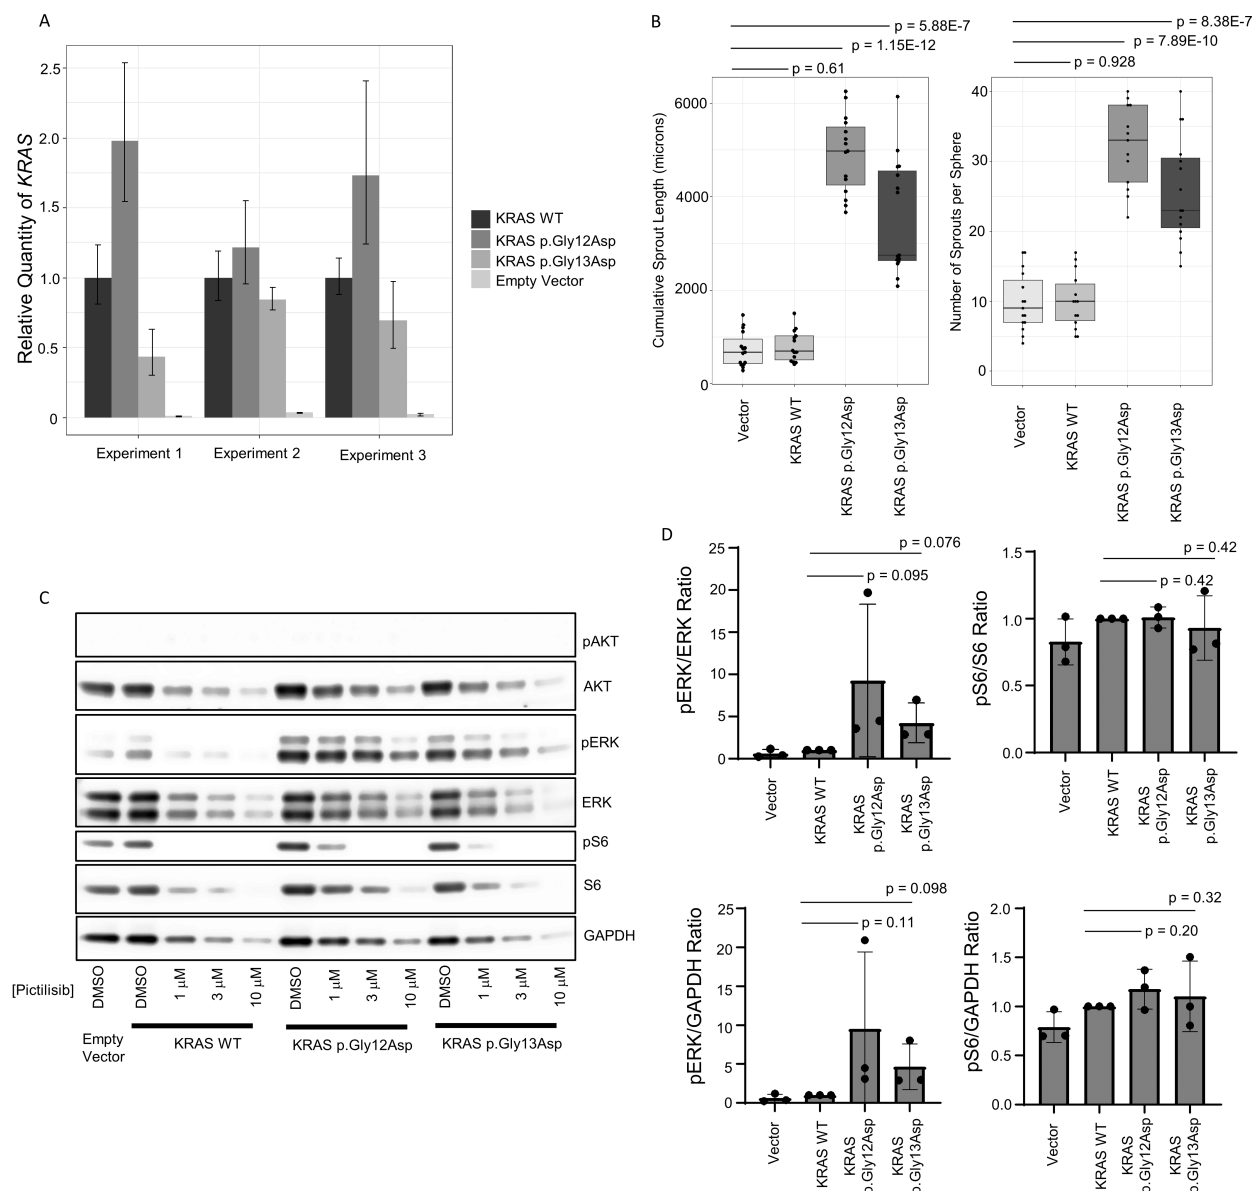

Supplemental Figure 2: Expression of *KRAS* WT, p.Gly12Asp, and p.Gly13Asp in HDLECs. **A**. Expression of retrovirally transduced *KRAS* was determined by qRT-PCR using primers targeting *KRAS* and *GAPDH*. Expression was normalized to *GAPDH* and to expression of *KRAS* WT. The error bars in the qPCR data stretch from RQ-Min to RQ-Max, as calculated by the Quantstudio Software using the intra-experiment sample replicates. They represent the 95% confidence interval for the expression range. **B**. Spheroid sprouting assays were performed with HDLECs transduced with *KRAS* variants or empty retroviral vector. Data were quantitated from 3 independent experiments showing cumulative sprout length per sphere (left) and number of sprouts per sphere (right). In the box and whisker plots, the center line is the median, the lower and upper boundaries of the box are the 25% and 75% quartiles, and the whiskers extend to 1.5-times the interquartile range from the 25% and 75% quartiles. **C**. Cell lysates from HDLECs transduced with *KRAS* variants were immunoblotted for pERK at T202 and Y204, pS6 at S235/236, and pAKT at S473. Blots were reprobed for total ERK, S6, and AKT, and finally reprobed for GAPDH. **D**. Quantification of immunoblotting of the DMSO-treated condition from 3 independent experiments, pERK or pS6 normalized to either total protein (ERK or S6) or GAPDH, normalized to WT + DMSO sample. Bars are means, error bars are standard deviations. 1-sided student t-tests were performed to calculate significance, and p-values were adjusted for multiple testing using the FDR (Benjamini and Hochberg) method.

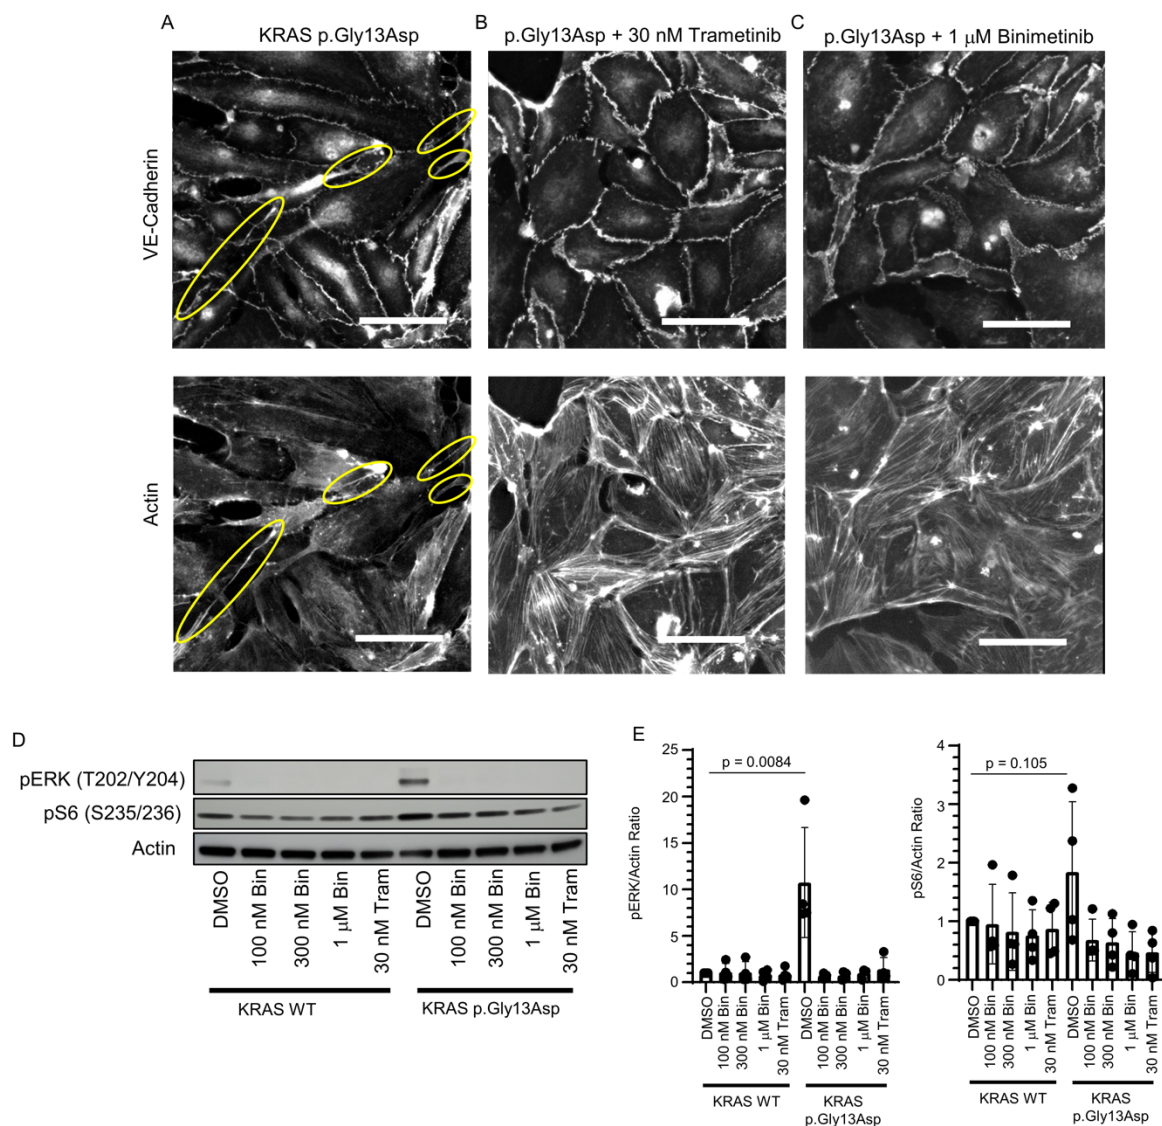

Supplemental Figure 3: Expression of *KRAS* p.Gly13Asp in HDLECs. A. Human dermal lymphatic endothelial cells (HDLECs) expressing *KRAS* p.Gly13Asp were stained with VE-cadherin or actin. Yellow circles show extensions from cells. B. *KRAS* p.Gly13Asp treated with 30 nM trametinib. C. *KRAS* p.Gly13Asp treated with 1  $\mu$ M binimetinib. Scale bars in all images represent 50 microns. D. Cell lysates from HDLECs transduced with either *KRAS* WT or p.Gly13Asp were immunoblotted for pERK at T202 and Y204 or pS6 at S235/236 with actin as control. Data were quantitated and from 4 independent experiments. E. Quantification of immunoblotting from 4 independent experiments, pERK or pS6 normalized to actin, normalized to WT + DMSO sample. Bars are means, error bars are standard deviations. Bin = binimetinib. Tram = trametinib. 1-sided student t-tests were performed to calculate significance.

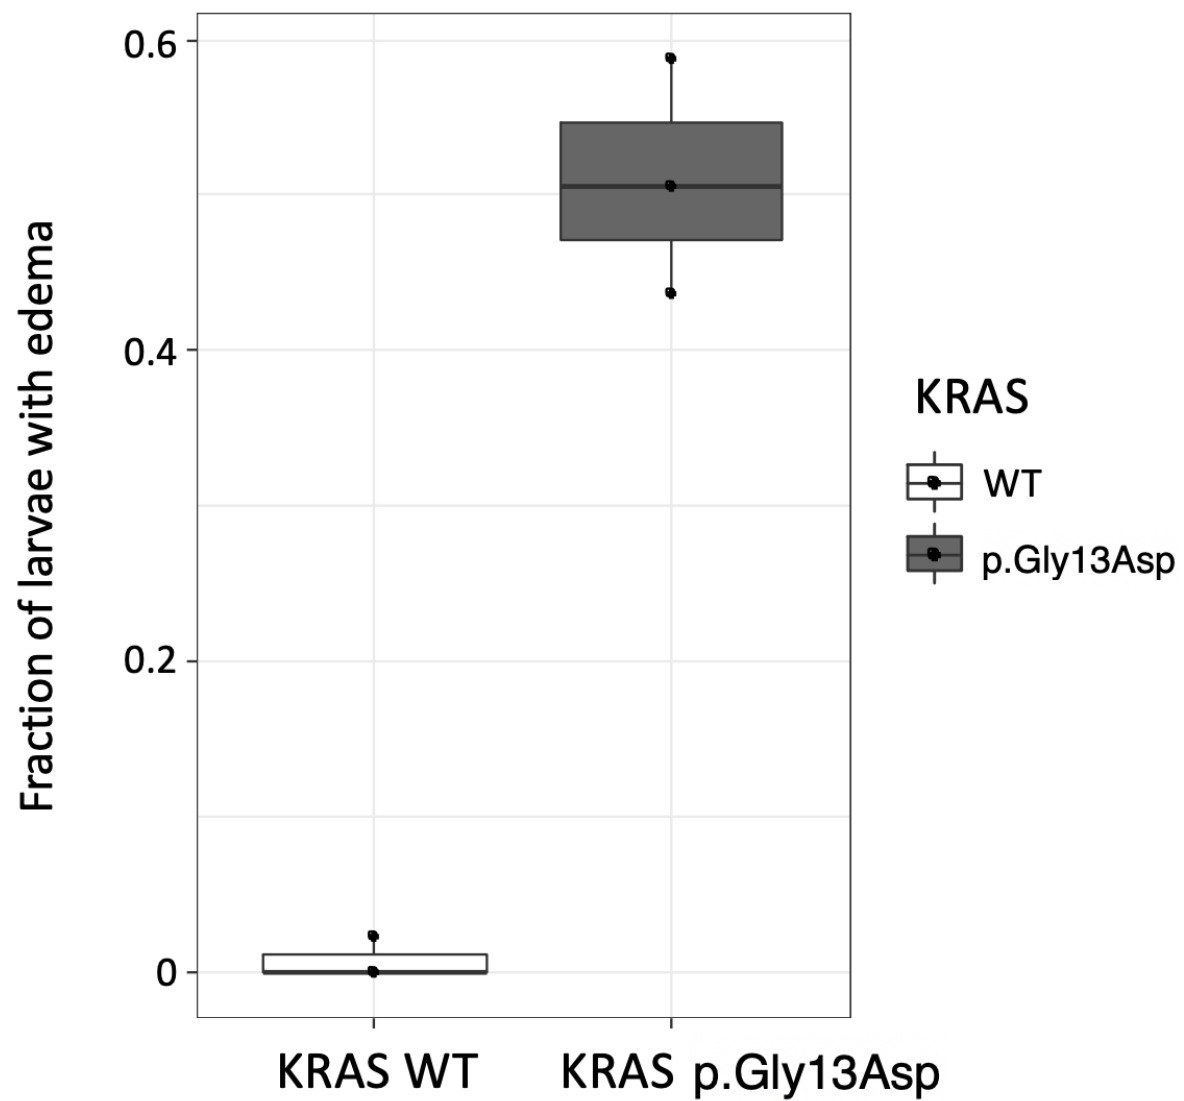

Supplemental Figure 4: Quantification of edema in *mrc1a:wt-hKRAS* (total  $n = 130$ ) and *mrc1a:hKRAS p.Gly13Asp* (total  $n = 166$ ) larvae at 5 dpf from three independent experiments.  $P = 0.0001$  by unpaired, one-tailed Student's  $t$ -tests.

**Supplemental Table 1: Pharmaceutical compounds trialed or mentioned in this study**

| Drug Name               | Target                                                                                 | Mechanism of Action                         | IC50                     | Current Developer                           | Development Stage                | Indications                                                                                                       |
|-------------------------|----------------------------------------------------------------------------------------|---------------------------------------------|--------------------------|---------------------------------------------|----------------------------------|-------------------------------------------------------------------------------------------------------------------|
| trametinib              | MEK1, MEK2                                                                             | ATP-non-competitive, allosteric inhibitor   | 0.92nM, 1.8nM            | Novartis                                    | FDA approved                     | Metastatic melanoma, lung cancer, thyroid cancer with BRAF V600E/V600K mutation                                   |
| cobimetinib             | MEK1                                                                                   | ATP-non-competitive, allosteric inhibitor   | 4.2nM                    | Exelixis, Roche                             | FDA approved                     | Metastatic melanoma with BRAF V600E/V600K mutation in combination with vemurafinib                                |
| binimetinib             | MEK1/2                                                                                 | ATP-non-competitive, allosteric inhibitor   | 12nM                     | Pfizer, Array BioPharma                     | FDA approved                     | Unresectable or metastatic melanoma in combination with BRAF V600E/V600K mutation in combination with encorafenib |
| ulixertinib             | ERK1, ERK2                                                                             | ATP-competitive inhibitor                   | <0.3nM                   | Biomed Valley Discoveries                   | Phase II                         | Multiple cancers                                                                                                  |
| dactolisib (BEZ235)     | Class I PI3K (p110 $\alpha$ , p110 $\gamma$ , p110 $\delta$ , p110 $\beta$ ) mTOR, ATR | ATP-competitive inhibitor                   | 4nM, 5nM, 7nM, 6nM, 21nM | resTORbio, Novartis                         | Phase III                        | Respiratory tract infections, multiple cancers                                                                    |
| Pictilisib (GDC-0941)   | Class I PI3K (p110 $\alpha$ , p110 $\gamma$ , p110 $\delta$ , p110 $\beta$ )           | ATP-competitive inhibitor                   | 3 nm                     | Genentech (prior to termination)            | Phase II                         | Breast cancer, lung carcinoma                                                                                     |
| pimasertib              | MEK1/2                                                                                 | ATP-non-competitive, allosteric inhibitor   | 5nM-2 $\mu$ M            | Day One Pharmaceuticals, Merck KGaA, Sanofi | Phase II                         | Multiple cancers                                                                                                  |
| AZD8330                 | MEK1/2                                                                                 | ATP-non-competitive inhibitor               | 7nM                      | Astrazeneca                                 | Phase I                          | Multiple cancers                                                                                                  |
| TAK-733                 | MEK1                                                                                   | ATP-non-competitive, allosteric inhibitor   | 3.2nM                    | Takeda                                      | Phase I                          | Multiple cancers                                                                                                  |
| SL-327                  | MEK1, MEK2                                                                             | Unknown                                     | 180nM, 220nM             | N/A                                         | Pre-clinical                     | N/A                                                                                                               |
| mirdametinib (PD032901) | MEK1/2                                                                                 | ATP-non-competitive, allosteric inhibitor   | 0.33nM                   | Springworks Therapeutics                    | Phase II                         | Neurofibromatosis, multiple cancers                                                                               |
| CI-1040 (PD184352)      | MEK1/2                                                                                 | ATP-non-competitive, allosteric inhibitor   | 17nM                     | Pfizer                                      | Phase II (development abandoned) | Multiple cancers                                                                                                  |
| PD0325901               | MEK                                                                                    | selective and non ATP-competitive inhibitor | 0.33 nM                  | SpringWorks Therapeutics, Inc               | Phase II                         | Plexiform neurofibroma<br>Neurofibromatosis Type 1                                                                |
| Sirolimus (Rapamycin)   | FKBP-12                                                                                | Complex with FKBP-12 binds and              | 0.1nM                    | Pfizer                                      | FDA approved for non-lymphatic   | Organ transplant rejection, lymphangioleiomyomatosis                                                              |

|                       |                   |                                  |               |         |                         |                                         |
|-----------------------|-------------------|----------------------------------|---------------|---------|-------------------------|-----------------------------------------|
|                       |                   | inhibits<br>mTOR                 |               |         | disorder<br>indications |                                         |
| OSI-027<br>(CERC-006) | mTORC1,<br>mTORC2 | ATP-<br>competitive<br>inhibitor | 22nM,<br>65nM | Cerecor | Phase II                | Lymphatic malformation, renal<br>cancer |

**Supplemental Table 2: Experimental numbers for Figure 4.** Cobimetinib was used as a control for experiments, thus the number of experiments is much greater than the others.

| <u>Variant</u> | <u>Drug</u>       | <u>Number of<br/>experiments</u> | <u>Control<br/>(total n)</u> | <u>Variant<br/>(total n)</u> | <u>p-value</u>        | <u>FDR-adjusted<br/>p-value</u> |
|----------------|-------------------|----------------------------------|------------------------------|------------------------------|-----------------------|---------------------------------|
| p.Gly12Asp     | Cobimetinib       | 9                                | 248                          | 271                          | 0.002                 | 0.0113                          |
| p.Gly12Asp     | CI-1040           | 3                                | 47                           | 61                           | 0.115                 | 0.178                           |
| p.Gly12Asp     | AZD8330           | 3                                | 47                           | 51                           | 0.007                 | 0.030                           |
| p.Gly12Asp     | Pimasertib        | 7                                | 177                          | 198                          | 0.0009                | 0.00765                         |
| p.Gly12Asp     | PD0325901         | 5                                | 151                          | 151                          | 0.076                 | 0.129                           |
| p.Gly12Asp     | TAK-733           | 3                                | 47                           | 51                           | 0.016                 | 0.040                           |
| p.Gly12Asp     | SL-327            | 3                                | 47                           | 55                           | 0.204                 | 0.262                           |
| p.Gly12Asp     | BEZ-235           | 5                                | 145                          | 135                          | 0.027                 | 0.051                           |
| p.Gly12Asp     | Sirolimus         | 4                                | 161                          | 142                          | 0.303                 | 0.343                           |
| p.Gly12Asp     | OSI-027<br>(1μM)  | 3                                | 105                          | 97                           | 0.438                 | 0.438                           |
| p.Gly12Asp     | OSI-027<br>(10μM) | 4                                | 161                          | 163                          | 0.435                 | 0.438                           |
| p.Gly13Asp     | Cobimetinib       | 9                                | 224                          | 213                          | 9.46x10 <sup>-6</sup> | 1.61x10 <sup>-4</sup>           |
| p.Gly13Asp     | CI-1040           | 7                                | 172                          | 177                          | 0.009                 | 0.031                           |
| p.Gly13Asp     | Binimetinib       | 4                                | 107                          | 103                          | 0.018                 | 0.040                           |
| p.Gly13Asp     | Pictilisib        | 4                                | 123                          | 126                          | 0.165                 | 0.233                           |
| p.Gly13Asp     | BEZ-235           | 4                                | 123                          | 120                          | 0.216                 | 0.262                           |
| p.Gly13Asp     | Sirolimus         | 4                                | 123                          | 116                          | 0.019                 | 0.040                           |
